# Supplementary material
Source: Springer Nature journal article supplement (https://www.springermedizin.de/resource/supplementary/13022_2008_17_MOESM1_ESM.pdf/9641316)

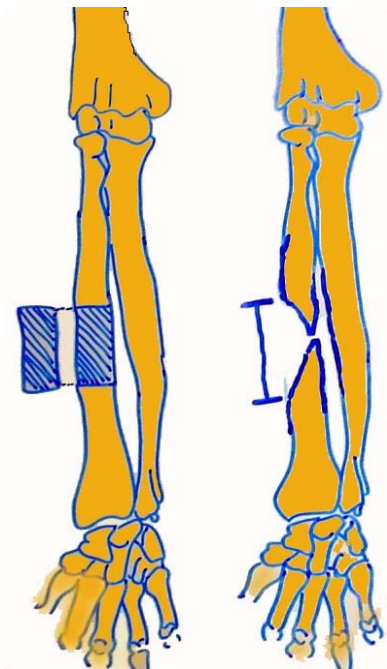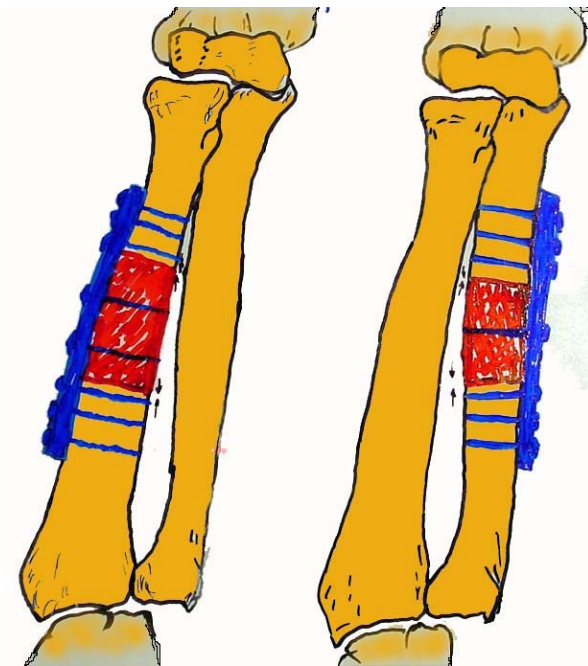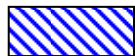

**Bone defect (nonunion)**

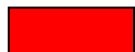

**Cancellous bone graft**

Supplement: MOESM1 [file 9641316]
